# Supplementary material
Source: PubMed Central journal article supplement (PMC6016730)
Supplement: Supp_Figure1.pdf [file Supp_Figure1.pdf]

## Supplementary Data

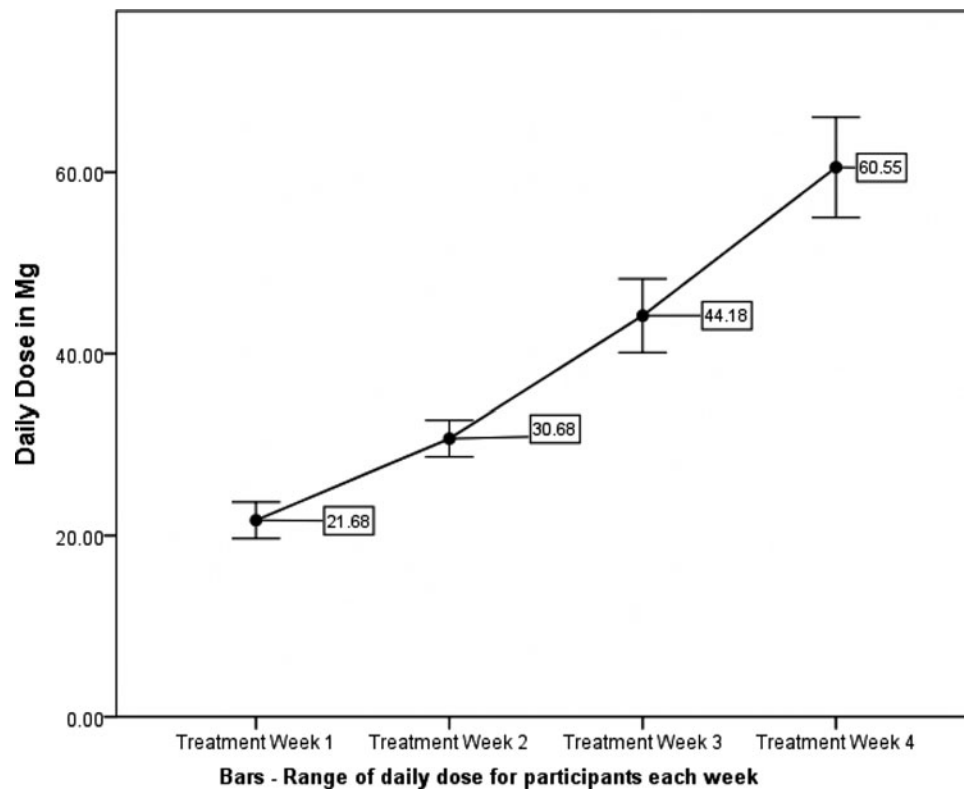

**SUPPLEMENTARY FIG. S1.** Titration of methylphenidate dose. Figure depicts the average weekly dosage for the group.
