# Supplementary material
Source: PubMed Central journal article supplement (PMC6016730)
Supplement: Supp_Figure2.pdf [file Supp_Figure2.pdf]

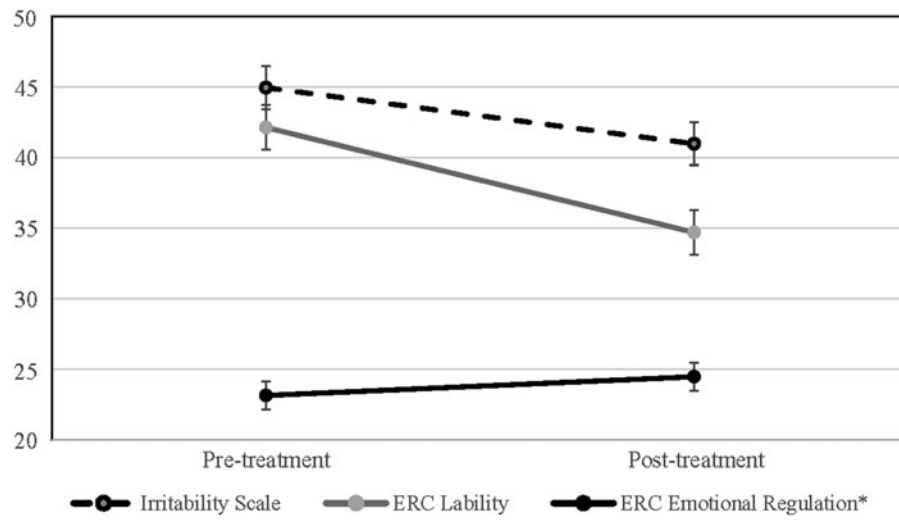

**SUPPLEMENTARY FIG. S2.** Treatment outcomes. Figure depicts irritability, lability, and emotional regulation symptom measures pre- and posttreatment. \*Reverse scored.
