# Supplementary material
Source: PubMed Central journal article supplement (PMC6016730)
Supplement: Supp_Table1.pdf [file Supp_Table1.pdf]

SUPPLEMENTARY TABLE S1. CORRELATIONS FOR DEMOGRAPHIC FACTORS AND TREATMENT OUTCOME FOR IRRITABILITY

|                              | 1 | 2     | 3                  | 4                   | 5                  | 6                   | 7                   |
|------------------------------|---|-------|--------------------|---------------------|--------------------|---------------------|---------------------|
| 1. Irritability <sup>a</sup> | — | 0.098 | 0.107 <sup>b</sup> | -0.234              | 0.079              | 0.147               | 0.583**             |
| 2. Age                       |   | —     | 0.044 <sup>b</sup> | -0.367              | 0.072              | -0.429*             | -0.088              |
| 3. SES <sup>b</sup>          |   |       | —                  | -0.257 <sup>b</sup> | 0.092 <sup>b</sup> | -0.157 <sup>b</sup> | -0.037 <sup>b</sup> |
| 4. Hyperactivity             |   |       |                    | —                   | 0.125              | 0.184               | 0.031               |
| 5. Lability                  |   |       |                    |                     | —                  | -0.442*             | -0.156              |
| 6. Regulation                |   |       |                    |                     |                    | —                   | 0.140               |
| 7. Irritability <sup>c</sup> |   |       |                    |                     |                    |                     | —                   |

*n* = 22.

<sup>a</sup>Posttreatment.

<sup>b</sup>Spearman's correlation.

<sup>c</sup>Pretreatment.

\**p* < 0.05.

SES, socioeconomic status.
